# Supplementary material
Source: MDPI journal article supplement (https://www.mdpi.com/1424-2818/15/2/283)
Supplement: s1 [file s1]

**Table S1.** List of the studied mineral springs and observed richness (S), estimated richness (S.chao1), Shannon and Piélou indexes. The substrate sampled is also presented: artificial construction (AI).

| Number | Name                     | S  | S.chao1 | Shannon index | Piélou index | Substrate sampled |
|--------|--------------------------|----|---------|---------------|--------------|-------------------|
| 1      | Tennis                   | 1  | 1.0     | 0.0           | 0.0          | AI                |
| 2      | Ile                      | 6  | 9.0     | 0.8           | 0.1          | AI                |
| 3      | Sourcin                  | 6  | 12.0    | 0.8           | 0.1          | sediments         |
| 4      | Petit Jean               | 13 | 28.0    | 1.5           | 0.1          | sediments         |
| 5      | Tambour                  | 5  | 5.0     | 0.8           | 0.2          | AI                |
| 6      | Petit Saladis            | 8  | 10.0    | 0.7           | 0.1          | AI                |
| 7      | Roc Bleu                 | 21 | 54.0    | 1.3           | 0.1          | sediments         |
| 8      | Seepage                  | 8  | 11.0    | 0.7           | 0.1          | travertine        |
| 9      | Geyser                   | 5  | 6.0     | 0.8           | 0.2          | Pipe              |
| 10     | Valois                   | 6  | 9.0     | 0.7           | 0.1          | travertine        |
| 11     | mare                     | 2  | 2.0     | 0.1           | 0.0          | sediments         |
| 12     | Sail                     | 20 | 20.6    | 2.3           | 0.1          | stones            |
| 13     | Grand Saladis            | 8  | 9.0     | 0.9           | 0.1          | travertine        |
| 14     | Lys                      | 7  | 7.5     | 0.8           | 0.1          | AI                |
| 15     | Croizat                  | 2  | 2.0     | 0.5           | 0.3          | AI                |
| 16     | Felix                    | 11 | 16.0    | 0.7           | 0.1          | stones            |
| 17     | Bard                     | 5  | 5.0     | 0.5           | 0.1          | AI                |
| 18     | Bard 2                   | 26 | 35.0    | 1.9           | 0.1          | sediments         |
| 19     | Saurier 1                | 12 | 17.0    | 1.3           | 0.1          | sediments         |
| 20     | Saurier 1 cascade        | 7  | 8.0     | 1.2           | 0.2          | travertine        |
| 21     | Saurier 2                | 12 | 15.3    | 1.1           | 0.1          | stones            |
| 22     | Saurier 3 grotte         | 22 | 22.0    | 2.5           | 0.1          | travertine        |
| 23     | Tête de Lion             | 12 | 13.5    | 0.8           | 0.1          | sediments         |
| 24     | Tête de Lion 2           | 46 | 48.0    | 3.5           | 0.1          | sediments         |
| 25     | La Salet                 | 23 | 32.3    | 1.9           | 0.1          | sediments         |
| 26     | Giraudon                 | 8  | 14.0    | 1.0           | 0.1          | travertine        |
| 27     | Moranges                 | 5  | 5.0     | 0.8           | 0.2          | sediments         |
| 28     | Route de Sapchat         | 12 | 12.3    | 1.9           | 0.2          | travertine        |
| 29     | Anthonia                 | 9  | 12.0    | 1.4           | 0.2          | travertine        |
| 30     | Antonia zone humide      | 9  | 12.0    | 1.2           | 0.1          | sediments         |
| 31     | La Poste                 | 13 | 16.0    | 1.5           | 0.1          | sediments         |
| 32     | Marais salé              | 27 | 30.0    | 2.4           | 0.1          | sediments         |
| 33     | Bélonie                  | 15 | 22.5    | 1.8           | 0.1          | sediments         |
| 34     | Charles                  | 5  | 5.0     | 0.9           | 0.2          | AI                |
| 35     | Lefort                   | 3  | 3.0     | 0.2           | 0.1          | AI                |
| 36     | Saint-Cyr                | 4  | 4.0     | 0.2           | 0.1          | AI                |
| 37     | Laplace                  | 2  | 2.0     | 0.3           | 0.1          | travertine        |
| 38     | la Colline               | 3  | 3.0     | 0.7           | 0.2          | AI                |
| 39     | Unknown Augnat-sur-Ardes | 19 | 24.0    | 2.0           | 0.1          | sediments         |
| 40     | Cerisier                 | 8  | 14.0    | 1.2           | 0.1          | sediments         |
| 41     | Zagat                    | 28 | 33.3    | 2.3           | 0.1          | sediments         |

|    |                      |    |       |     |     |            |
|----|----------------------|----|-------|-----|-----|------------|
| 42 | Chassolles           | 26 | 29.5  | 2.2 | 0.1 | stones     |
| 43 | Gargouilloux         | 18 | 21.3  | 1.5 | 0.1 | stones     |
| 44 | Communale            | 12 | 15.0  | 0.8 | 0.1 | AI         |
| 45 | Puits de Ceix        | 4  | 4.0   | 0.5 | 0.1 | AI         |
| 46 | Saint Coust          | 28 | 30.5  | 2.1 | 0.1 | sediments  |
| 47 | Châtel-Guyon1        | 7  | 10.0  | 0.2 | 0.0 | AI         |
| 48 | Châtel-Guyon2        | 1  | 1.0   | 0.0 | 0.0 | travertine |
| 49 | Bénédictins          | 5  | 5.0   | 1.0 | 0.2 | travertine |
| 50 | Font Salado 1        | 31 | 42.3  | 1.5 | 0.0 | AI         |
| 51 | Font Salado Griffon  | 28 | 50.8  | 1.0 | 0.0 | sediments  |
| 52 | Poix 1               | 20 | 25.3  | 2.1 | 0.1 | sediments  |
| 53 | Poix 3               | 15 | 17.0  | 1.7 | 0.1 | stones     |
| 54 | La combelle          | 9  | 9.5   | 1.3 | 0.1 | AI         |
| 55 | Les graviers         | 7  | 7.0   | 1.1 | 0.2 | sediments  |
| 56 | Etoile               | 6  | 6.0   | 1.0 | 0.2 | AI         |
| 57 | Etoile bassin        | 14 | 24.0  | 1.3 | 0.1 | AI         |
| 58 | Daguillon            | 8  | 9.5   | 0.6 | 0.1 | sediments  |
| 59 | Ours                 | 5  | 6.0   | 0.9 | 0.2 | AI         |
| 60 | Geyser (Vals)        | 6  | 6.0   | 0.6 | 0.1 | AI         |
| 61 | Camuse               | 12 | 17.0  | 1.2 | 0.1 | AI         |
| 62 | Adrienne             | 9  | 10.5  | 1.1 | 0.1 | stones     |
| 63 | Saute Bedel          | 10 | 15.0  | 0.5 | 0.0 | stones     |
| 64 | Mille Fontaines      | 1  | 1.0   | 0.0 | 0.0 | stones     |
| 65 | Font de Vie          | 6  | 7.0   | 1.2 | 0.2 | AI         |
| 66 | Chantejail           | 16 | 23.0  | 0.9 | 0.1 | stones     |
| 67 | Ceyssat              | 9  | 9.0   | 1.4 | 0.2 | AI         |
| 68 | Vallée Couze d'Ardes | 24 | 29.6  | 1.4 | 0.1 | sediments  |
| 69 | Trois Sauts          | 26 | 42.5  | 1.7 | 0.1 | sediments  |
| 70 | Salée                | 19 | 21.0  | 2.0 | 0.1 | sediments  |
| 71 | Bonnefont            | 67 | 137.9 | 3.1 | 0.0 | sediments  |
| 72 | Saillus              | 16 | 19.8  | 1.3 | 0.1 | sediments  |
| 73 | Pont des Eaux        | 9  | 9.3   | 1.0 | 0.1 | sediments  |
| 74 | Ceix                 | 14 | 17.3  | 0.9 | 0.1 | sediments  |
| 75 | Chemin               | 13 | 23.0  | 1.3 | 0.1 | sediments  |
| 76 | Salut                | 22 | 25.3  | 1.7 | 0.1 | sediments  |
| 77 | La Montoute          | 5  | 5.0   | 0.7 | 0.1 | sediments  |
| 78 | Pyronnée             | 8  | 8.5   | 0.9 | 0.1 | stones     |
| 79 | Pranal-Ste Barbe     | 10 | 13.0  | 1.6 | 0.2 | sediments  |

---

**Table S2.** List of the diatom species encountered.

|                                                                                     |                                                                                                                         |
|-------------------------------------------------------------------------------------|-------------------------------------------------------------------------------------------------------------------------|
| <i>Achnanthes brevipes</i> Agardh                                                   | <i>Navicula salinarum</i> Grunow in Cleve & Grunow                                                                      |
| <i>Achnanthidium eutrophilum</i> (Lange-Bertalot) Lange-Bertalot                    | <i>Navicula tenelloides</i> Hustedt                                                                                     |
| <i>Achnanthidium microcephalum</i> Kützing sensu W. Smith                           | <i>Navicula veneta</i> Kützing                                                                                          |
| <i>Achnanthidium minutissimum</i> (Kützing) Czarnecki                               | <i>Navicula vilaplani</i> (Lange-Bertalot & Sabater) Lange-Bertalot & Sabater in U. Rumrich Lange-Bertalot & M. Rumrich |
| <i>Achnanthidium rivulare</i> Potapova & Ponader                                    | <i>Nitzschia</i> sp.                                                                                                    |
| <i>Achnanthidium subhudsonis</i> (Hustedt) H. Kobayasi                              | <i>Nitzschia</i> sp.1                                                                                                   |
| <i>Achnanthidium saprophilum</i> (Kobayasi et Mayama) Round & Bukhtiyarova          | <i>Nitzschia</i> sp.2                                                                                                   |
| <i>Adlafia bryophila</i> (Petersen) Moser Lange-Bertalot & Metzeltin                | <i>Nitzschia</i> sp.3                                                                                                   |
| <i>Adlafia minuscula</i> var. <i>muralis</i> (Grunow) Lange-Bertalot                | <i>Nitzschia</i> aff. <i>perminuta</i> (Grunow) M. Peragallo                                                            |
| <i>Adlafia suchlandtii</i> (Hustedt) Monnier & Ector                                | <i>Nitzschia</i> aff. <i>archibaldii</i> Lange-Bertalot                                                                 |
| <i>Anomoeoneis sphaerophora</i> (Ehr.) Pfitzer                                      | <i>Nitzschia</i> aff. <i>bulnheimiana</i>                                                                               |
| <i>Crenotia thermalis</i> (Rabenhorst) Wojtal                                       | <i>Nitzschia</i> aff. <i>liebethruthii</i> Rabenhorst                                                                   |
| <i>Crenotia angustior</i> (Grunow) Wojtal                                           | <i>Nitzschia amphibia</i> Grunow                                                                                        |
| <i>Amphora</i> sp.                                                                  | <i>Nitzschia austriaca</i> Hustedt                                                                                      |
| <i>Amphora copulata</i> (Kütz) Schoeman & Archibald                                 | <i>Nitzschia costei</i> Tudesque, Rimet & Ector                                                                         |
| <i>Amphora indistincta</i> Levkov                                                   | <i>Nitzschia communis</i> Rabenhorst                                                                                    |
| <i>Amphora ovalis</i> (Kützing) Kützing                                             | <i>Nitzschia commutata</i> Grunow in Cleve et Grunow                                                                    |
| <i>Caloneis</i> sp.                                                                 | <i>Nitzschia dissipata</i> (Kützing) Grunow                                                                             |
| <i>Caloneis</i> sp. cf. <i>bacillum</i> (Grunow) Cleve                              | <i>Nitzschia fonticola</i> Grunow in Cleve et Möller                                                                    |
| <i>Caloneis fontinalis</i> (Grunow in Van Heurck) Cleve-Euler                       | <i>Nitzschia frustulum</i> (Kützing) Grunow                                                                             |
| <i>Caloneis schumanniana</i> (Grunow) Cleve                                         | <i>Nitzschia hantzschiana</i> Rabenhorst                                                                                |
| <i>Cavinula jaernefeltii</i> (Hustedt) Mann & Stickle in Round Crawford & Mann      | <i>Nitzschia inconspicua</i> Grunow                                                                                     |
| <i>Chamaepinnularia salina</i> Beauger, C.E. Wetzel, Allain & Ector                 | <i>Nitzschia linearis</i> (Agardh) W.M. Smith                                                                           |
| <i>Chamaepinnularia evanida</i> (Hustedt) Lange-Bertalot                            | <i>Nitzschia microcephala</i> Grunow in Cleve & Moller                                                                  |
| <i>Chamaepinnularia muscicola</i> (Petersen) Kulikovskiy, Lange-Bertalot & Witowski | <i>Nitzschia ovalis</i> Arnott ex Grunow in Cl. & Grun.                                                                 |
| <i>Cocconeis lineata</i> Ehrenberg                                                  | <i>Nitzschia palea</i> (Kützing) W. Smith                                                                               |
| <i>Cocconeis euglypta</i> Ehrenberg                                                 | <i>Nitzschia pusilla</i> (Kützing) Grunow                                                                               |
| <i>Cocconeis pseudolineata</i> (Geitler) Lange-Bertalot                             | <i>Nitzschia soratensis</i> Morales & Vis                                                                               |
| <i>Craticula buderi</i> (Hustedt) Lange-Bertalot                                    | <i>Nitzschia supralitoria</i> Lange-Bertalot                                                                            |
| <i>Craticula halophila</i> (Grunow ex Van Heurck) D.G. Mann in Round et al.         | <i>Nitzschia valdecostata</i> Lange-Bertalot et Simonsen                                                                |
| <i>Craticula lecohui</i> Beauger et al.                                             | <i>Nitzschia valdestriata</i> Aleem & Hustedt                                                                           |
| <i>Cyclotella meneghiniana</i> Kützing                                              | <i>Nitzschia vitrea</i> Norman                                                                                          |
| <i>Cymbella cymbiformis</i> Agardh                                                  | <i>Nitzschia wuellerstorffii</i> Lange-Bertalot                                                                         |
| <i>Cymbella hantzschiana</i> Krammer                                                | <i>Nupela silvahercynia</i> (Lange-Bertalot) Lange-Bertalot                                                             |
| <i>Cymbella vulgata</i> Krammer                                                     | <i>Pinnularia</i> sp.                                                                                                   |
| <i>Denticula</i> sp.                                                                | <i>Pinnularia appendiculata</i> (Agardh) Cleve                                                                          |
| <i>Denticula subtilis</i> Grunow                                                    | <i>Pinnularia bertrandii</i> Krammer var. <i>angustefasciata</i> Krammer                                                |
| <i>Denticula tenuis</i> Kützing                                                     | <i>Pinnularia brebissonii</i> (Kützing) Rabenhorst                                                                      |
| <i>Denticula valida</i> (Pedicino) Grunow in Van Heurck                             | <i>Pinnularia brebissonii</i> (Kütz.) Rabh. var. <i>bicuneata</i> Grunow in Van Heurck                                  |
| <i>Diadesmis biceps</i> Arnott                                                      | <i>Pinnularia</i> cf. <i>notabiliformis</i> Krammer                                                                     |

|                                                                                                              |                                                                                                |
|--------------------------------------------------------------------------------------------------------------|------------------------------------------------------------------------------------------------|
| <i>Diploneis</i> sp.                                                                                         | <i>Pinnularia</i> cf. <i>oriunda</i> Krammer                                                   |
| <i>Diploneis</i> sp.2                                                                                        | <i>Pinnularia halophila</i> Krammer                                                            |
| <i>Diploneis krammeri</i> Lange-Bertalot & Reichardt                                                         | <i>Pinnularia isselana</i> Krammer                                                             |
| <i>Diploneis fontanella</i> Lange-Bertalot                                                                   | <i>Pinnularia kuetzingii</i> Krammer                                                           |
| <i>Diploneis fontium</i> Reichardt & Lange-Bertalot in Reichardt                                             | <i>Pinnularia persudetica</i> Krammer                                                          |
| <i>Diploneis oblongella</i> (Naegeli) Cleve-Euler                                                            | <i>Pinnularia subcommutata</i> Krammer var. <i>nonfasciata</i> Krammer                         |
| <i>Diploneis petersenii</i> Hustedt                                                                          | <i>Planothidium delicatulum</i> (Kützing) Round & Bukhtiyarova                                 |
| <i>Diploneis oculata</i> (Brebisson in Desmazières) Cleve                                                    | <i>Planothidium frequentissimum</i> (Lange-Bertalot) Lange-Bertalot                            |
| <i>Encyonema minutum</i> (Hilse in Rabh.) D.G. Mann in Round Crawford & Mann                                 | <i>Planothidium lanceolatum</i> (Brebisson ex Kützing) Lange-Bertalot                          |
| <i>Encyonema silesiacum</i> (Bleisch in Rabh.) D.G. Mann                                                     | <i>Planothidium straubianum</i> C.E.Wetzel, Van de Vijver & Ector                              |
| <i>Encyonema ventricosum</i> (Agardh) Grunow in Schmidt & al.                                                | <i>Planothidium victorii</i> Novis, Braidwood & Kilroy                                         |
| <i>Epithemia adnata</i> (Kützing) Brebisson                                                                  | <i>Psammodictyon constrictum</i> (Gregory) D.G. Mann in Round & al.                            |
| <i>Epithemia turgida</i> (Ehrenberg) Kützing                                                                 | <i>Psammothidium bioretii</i> (Germain) Bukhtiyarova et Round                                  |
| <i>Fallacia</i> sp.                                                                                          | <i>Psammothidium subatomoides</i> (Hustedt) Bukhtiyarova et Round                              |
| <i>Fallacia frustulum</i> (Hustedt) D.G. Mann                                                                | <i>Pseudofallacia</i> sp.                                                                      |
| <i>Fallacia lange-bertalotii</i> (Reichardt) Reichardt                                                       | <i>Pseudofallacia</i> aff. <i>losevae</i> (Lange-Bertalot Genkal & Vekhov) Liu Kociolek & Wang |
| <i>Fallacia pygmaea</i> (Kützing) Stickle et D.G. Mann                                                       | <i>Pseudofallacia monoculata</i> (Hustedt) Liu Kociolek & Wang                                 |
| <i>Fontina arverna</i> Beauger, C.E. Wetzel & Ector                                                          | <i>Pseudostaurosira</i> sp.                                                                    |
| <i>Fragilaria capucina</i> Desmazieres                                                                       | <i>Pseudostaurosira</i> aff. <i>brevistriata</i> (Grunow in Van Heurck) Williams & Round       |
| <i>Fragilaria famelica</i> (Kützing) Lange-Bertalot                                                          | <i>Pseudostaurosira alvareziae</i> Cejudo-Figueras Morales & Ector                             |
| <i>Fragilaria pararumpens</i> Lange-Bertalot, Hofmann & Werum in Hofmann & al.                               | <i>Pseudostaurosira bardii</i> Beauger, C.E. Wetzel and Ector                                  |
| <i>Fragilaria rumpens</i> (Kützing) G.W.F.Carlson                                                            | <i>Pseudostaurosira cataractarum</i> (Hustedt) C.E. Wetzel, E. Morales & Ector                 |
| <i>Fragilaria sandellii</i> Van de Vijver & Jarlman                                                          | <i>Pseudostaurosira cubonii</i> D.M.Williams & C.E.Wetzel                                      |
| <i>Fragilaria vaucheriae</i> (Kützing) Petersen                                                              | <i>Punctastriata ovalis</i> Williams & Round                                                   |
| <i>Frustulia vulgaris</i> (Thwaites) De Toni                                                                 | <i>Pulchella</i> sp.                                                                           |
| <i>Gedaniella</i> sp.                                                                                        | <i>Orthoseira</i> sp.                                                                          |
| <i>Gomphonema clavatum</i> Ehrenberg                                                                         | <i>Sellaphora atomoides</i> Wetzel & Van de Vijver                                             |
| <i>Gomphonema exilissimum</i> (Grunow) Lange-Bertalot & Reichardt                                            | <i>Sellaphora crassulexigua</i> (E.Reichardt) C.E. Wetzel & Ector                              |
| <i>Gomphonema lippertii</i> Reichardt & Lange-Bertalot                                                       | <i>Sellaphora labernardierei</i> Beauger, C.E.Wetzel et Ector                                  |
| <i>Gomphonema minutum</i> (Agardh) Agardh                                                                    | <i>Sellaphora nigri</i> (De Not.) C.E. Wetzel et Ector                                         |
| <i>Gomphonema parvulum</i> (Kützing) Kützing                                                                 | <i>Sellaphora pupula</i> (Kützing) Mereschkowsky                                               |
| <i>Gomphonema saprophilum</i> (Lange-Bertalot & Reichardt) Abarca Jahn Zimmermann & Enke                     | <i>Sellaphora saugerresii</i> (Desm.) C.E. Wetzel & D.G. Mann                                  |
| <i>Halamphora</i> sp.                                                                                        | <i>Sellaphora seminulum</i> (Grunow) D.G. Mann                                                 |
| <i>Halamphora</i> aff. <i>acutiuscula</i> (Kützing) Levkov                                                   | <i>Staurosira robusta</i> (Fusey) Lange-Bertalot                                               |
| <i>Halamphora</i> aff. <i>subturgida</i> (Hustedt) Levkov                                                    | <i>Staurosira venter</i> (Ehrenberg) Cleve & Moeller                                           |
| <i>Halamphora coffeaeformis</i> (Agardh) Levkov                                                              | <i>Stauroneis</i> sp.                                                                          |
| <i>Halamphora normanii</i> (Rabenhorst) Levkov                                                               | <i>Stauroneis</i> sp.2                                                                         |
| <i>Hantzschia amphioxys</i> (Ehr.) Grunow in Cleve et Grunow                                                 | <i>Stauroneis</i> aff. <i>reichardtii</i> Lange-Bertalot, Cavacini, Tagliaventi & Alfinito     |
| <i>Hannaea arcus</i> (Ehr.) R.M. Patrick in Patrick et Reimer                                                | <i>Stauroneis</i> aff. <i>muriella</i> Lund                                                    |
| <i>Hippodonta subtilissima</i> Lange-Bertalot Metzeltin & Witkowski                                          | <i>Stauroneis leguminopsis</i> Lange-Bertalot & Krammer                                        |
| <i>Humidophila brekkaensis</i> (Petersen) Lowe, Kociolek, Johansen, Van de Vijver, Lange-Bertalot & Kopalová | <i>Stauroneis parathermicola</i> Lange-Bertalot in Hofman Werum & Lange-Bertalot               |

*Humidophila contenta* (Grunow) Lowe, Kociolek, Johansen, Van de Vijver, Lange-Bertalot & Kopalová  
*Humidophila gallica* (W.Smith) Lowe, Kociolek, Q.You, Q.Wang & Stepanek  
*Humidophila perpusilla* (Grunow) Lowe, Kociolek, Johansen, Van deVijver, Lange-Bertalot & Kopalová  
*Hygropetra elongata* Krammer & Lange-Bertalot  
  
*Kolbesia gessneri* (Hustedt) Aboal  
  
*Luticola mutica* (Kützing) D.G. Mann in Round Crawford & Mann  
*Luticola goeppertiana* (Bleisch in Rabenhorst) D.G.Mann in Round Crawford & Mann  
  
*Mastogloia elliptica* (C.A. Agardh) Cleve  
*Mastogloia smithii* Thwaites  
  
*Mayamaea* sp.  
*Mayamaea atomus* (Kützing) Lange-Bertalot  
*Microcostatus* sp.  
*Melosira varians* Agardh  
*Meridion circulare* (Greville) C.A.Agardh  
*Meridion constrictum* Ralfs  
*Nitzschia amphibia* Grunow  
*Navicula* sp.  
*Navicula* aff. *antonii* Lange-Bertalot  
*Navicula sanctamargaritae* Beauger in Beauger & al.  
*Navicula cincta* (Ehr.) Ralfs in Pritchard  
*Navicula gregaria* Donkin  
*Navicula lanceolata* (Agardh) Ehrenberg  
*Navicula rostellata* Kützing

---

*Rhoicosphenia abbreviata* (C.Agardh) Lange-Bertalot  
  
*Rhoicosphenia lacustris* Levkov  
  
*Rhopalodia acuminata* Krammer  
*Rhopalodia brebissonii* Krammer  
*Rhopalodia gibba* (Ehrenberg) O.Muller  
*Rhopalodia gibberula* (Ehrenberg) O.Müller  
  
*Rhopalodia operculata* (Agardh) Håkansson  
*Reimeria sinuata* (Gregory) Kociolek & Stoermer  
*Seminavis pusilla* (Grunow) E.J. Cox & G. Reid  
*Simonsenia* sp.  
*Simonsenia delognei* Lange-Bertalot  
*Surirella* sp.  
*Surirella brebissonii* Krammer & Lange- Bertalot  
*Surirella brebissonii* var. *kuetzingii* Krammer & Lange- Bertalot  
*Surirella brightwellii* W.Smith  
*Surirella* sp. cf. *brightwellii*  
*Surirella ovalis* Brébisson  
*Surirella patella* Kützing  
*Tryblionella* sp.  
*Tryblionella kuetsingii* Alvarez-Blanco & S.Blanco  
*Tryblionella hungarica* (Grunow) D.G. Mann in Round & al.  
*Tryblionella debilis* Arnott ex O'Meara
